# Supplementary material for: Neighborhood Perceptions and Cumulative Impacts of Low Level Chronic Exposure to Fine Particular Matter (PM2.5) on Cardiopulmonary Health
Source: MDPI journal article supplement (doi:10.3390/ijerph15010084), 2018-01-06
Supplement: s1 [file s1]

**Supplemental Table 1. Summary of pulmonary function measures by study population characteristics.**

|                                            | <b>FEV1<br/>(L per 1 sec)<br/>Mean(SD)</b> | <b>p-<br/>value</b> | <b>FVC<br/>(Liters)<br/>Mean(SD)</b> | <b>p-<br/>value</b> | <b>FEV1_FVC<br/>Ratio<br/>(%)</b> | <b>p -value</b> |
|--------------------------------------------|--------------------------------------------|---------------------|--------------------------------------|---------------------|-----------------------------------|-----------------|
| Total                                      | 3.09 (.02)                                 |                     | 3.75 (.03)                           |                     | .83 (.00)                         |                 |
| <i>Demographics</i>                        |                                            |                     |                                      |                     |                                   |                 |
| Age, years                                 |                                            | <.000               |                                      | <.000               |                                   | 0.418           |
| 21-39                                      | 3.50 (.04)                                 |                     | 4.25 (.05)                           |                     | .83 (.00)                         |                 |
| 40-54                                      | 3.04 (.03)                                 |                     | 3.68 (.04)                           |                     | .84 (.00)                         |                 |
| 55-74                                      | 2.56 (.03)                                 |                     | 3.14 (.04)                           |                     | .83 (.00)                         |                 |
| Sex                                        |                                            | <.000               |                                      | <.000               |                                   | <.000           |
| Male                                       | 3.57(.03)                                  |                     | 4.33(.04)                            |                     | .83(.00)                          |                 |
| Female                                     | 2.59(.02)                                  |                     | 3.15(.03)                            |                     | .84(.00)                          |                 |
| Race/Ethnicity                             |                                            | 0.098               |                                      | 0.103               |                                   | 0.052           |
| White, Non-Hispanic                        | 3.11 (.03)                                 |                     | 3.77(.03)                            |                     | .83(.00)                          |                 |
| Black, Non-Hispanic                        | 2.65 (.09)                                 |                     | 3.39(.13)                            |                     | .81(.02)                          |                 |
| Hispanic                                   | 3.28 (.11)                                 |                     | 4.02 (.17)                           |                     | .83(.02)                          |                 |
| Other                                      | 3.04(.09)                                  |                     | 3.58 (.11)                           |                     | .86(.01)                          |                 |
| Household Income<br>(mid-point, b4 taxes)  |                                            | <.000               |                                      | 0.016               |                                   | 0.335           |
| 0-19.9K                                    | 3.07 (.09)                                 |                     | 3.83 (.11)                           |                     | .82(.01)                          |                 |
| 20-49.9                                    | 2.97 (0.4)                                 |                     | 3.65 (.06)                           |                     | .83(.01)                          |                 |
| 50-74.9                                    | 3.13 (.05)                                 |                     | 3.80 (.07)                           |                     | .83(.01)                          |                 |
| 75-99.9                                    | 3.17 (.05)                                 |                     | 3.78 (.06)                           |                     | .85(.01)                          |                 |
| >100                                       | 3.15 (.04)                                 |                     | 3.76 (.05)                           |                     | .84(.00)                          |                 |
| Education                                  |                                            | <.000               |                                      | 0.001               |                                   | 0.015           |
| <HS                                        | 2.79 (.08)                                 |                     | 3.05 (.11)                           |                     | .81 (.01)                         |                 |
| HS or some college                         | 3.08 (.03)                                 |                     | 3.76 (.04)                           |                     | .83 (.00)                         |                 |
| College graduate or >                      | 3.15(.03)                                  |                     | 3.78 (.04)                           |                     | .84 (.00)                         |                 |
| <i>Health Behaviors</i>                    |                                            |                     |                                      |                     |                                   |                 |
| Length of Residence in<br>Household, years |                                            | <.000               |                                      | <.000               |                                   | 0.845           |
| < 5 years                                  | 3.23 (0.4)                                 |                     | 3.95 (.05)                           |                     | .83 (.00)                         |                 |
| >5 years                                   | 3.03 (.03)                                 |                     | 3.67 (.03)                           |                     | .83 (.00)                         |                 |
| Physical Activity                          |                                            |                     |                                      |                     |                                   |                 |
| Met_mIn_week                               |                                            | <.000               |                                      | <.000               |                                   | 0.316           |
| >600                                       | 2.90 (.05)                                 |                     | 3.50 (.06)                           |                     | .84 (.00)                         |                 |
| <600                                       | 3..15 (.03)                                |                     | 3.83 (.03)                           |                     | .83 (.00)                         |                 |

|                                                       |            |       |             |       |           |       |
|-------------------------------------------------------|------------|-------|-------------|-------|-----------|-------|
| Smoking Status                                        |            | 0.004 |             | 0.283 |           | <.000 |
| current                                               | 3.04 (.06) |       | 3.76 (.07)  |       | .81 (.01) |       |
| former                                                | 3.04 (.04) |       | 3.67 (.04)  |       | .84 (.00) |       |
| never                                                 | 3.13 (.03) |       | 3.78 (.04)  |       | .84 (.00) |       |
| <i>Neighborhood Perceptions of Quality and Safety</i> |            |       |             |       |           |       |
| Safety from Crime                                     |            | <.000 |             | <.000 |           | 0.51  |
| < somewhat safe                                       | 2.97 (.04) |       | 3.63 (.05)  |       | .83 (.01) |       |
| very safe                                             | 3.14 (.03) |       | 3.80 (.03)  |       | .84 (.00) |       |
| Many Destinations                                     |            | 0.004 |             | 0.01  |           | 0.801 |
| Agree*                                                | 3.15 (.03) |       | 3.82 (.04)  |       | .84 (.00) |       |
| Disagree                                              | 3.01 (.03) |       | 3.67 (.04)  |       | .83 (.00) |       |
| Well Maintained                                       |            | 0.884 |             | 0.811 |           | 0.247 |
| Agree                                                 | 3.09 (.02) |       | 3.76 (.03)  |       | .83 (.00) |       |
| Disagree                                              | 3.08 (.07) |       | 3.75 (.08)  |       | .83 (.01) |       |
| Neighborhood Stress                                   |            | 0.899 |             | 0.825 |           | 0.943 |
| Yes                                                   | 3.08 (.03) |       | 3.76 (.06)  |       | .83 (.01) |       |
| No                                                    | 3.10 (.05) |       | 3.75 (.03)  |       | .83 (.00) |       |
| <i>Contextual Neighborhood Level Factors</i>          |            |       |             |       |           |       |
| Economic Hardship                                     |            | 0.387 |             | 0.831 |           | 0.883 |
| Low                                                   | 3.10 (.04) |       | 3.75 (.04)  |       | .83 (.00) |       |
| Med                                                   | 3.09 (.04) |       | 3.76 (.05)  |       | .83 (.00) |       |
| High                                                  | 3.07 (.05) |       | 3.74 (.06)  |       | .83 (.01) |       |
| Urbanicity                                            |            | 0.15  |             | 0.013 |           | 0.009 |
| Urban                                                 | 3.12 (.03) |       | 3.81 (.04)  |       | .83 (.00) |       |
| Suburban                                              | 3.06 (.03) |       | 3.68 (.04)  |       | .84 (.01) |       |
| Rural                                                 | 3.05 (.05) |       | 3.69 (.06)  |       | .84 (.00) |       |
| <i>Respiratory Health</i>                             |            |       |             |       |           |       |
| Asthma Prevalence                                     |            | 0.04  |             | 2.11  |           | 0.401 |
| Yes                                                   | 2.99 (.07) |       | 3.62 (.075) |       | .83 (.01) |       |
| No                                                    | 3.10 (.03) |       | 3.77 (.03)  |       | .83 (.00) |       |

---

---

**Supplemental Table 2. Measures of Perceived Neighborhood Quality**

---

|                                                                                                                                       |                                                    |
|---------------------------------------------------------------------------------------------------------------------------------------|----------------------------------------------------|
| Over the past 12 months how much stress did you experience from living in your neighborhood?<br>**includes crime, traffic or safety** | None, mild, moderate to severe, does not apply     |
| How safe from crime is your community for walking and biking?                                                                         | Not at all, not very, some-what and very           |
| There is easy access in walking distance to fruits and vegetables in my community.                                                    | Strongly disagree, disagree, agree, strongly agree |
| There are many destinations within easy walking distance                                                                              | Strongly disagree, disagree, agree, strongly agree |
| My community is generally free from garbage, litter or broken glass.                                                                  | Strongly disagree, disagree, agree, strongly agree |
| My community is well-maintained                                                                                                       | Strongly disagree, disagree, agree, strongly agree |

---
